# Supplementary material for: Thermoreversible ionogels with tunable properties via aqueous gelation of an amphiphilic quaternary ammonium oligoether-based ionic liquid
Source: Royal Society of Chemistry journal article supplement (doi:10.1039/c0jm02061c), 2010-01-01
Supplement: c0jm02061c.pdf [file c0jm02061c.pdf]

## Electronic Supporting Information

### Thermoreversible ionogels with tunable properties via aqueous gelation of an amphiphilic quaternary ammonium oligoether-based ionic liquid

Josep Casamada Ribot,<sup>a,b</sup> Carlos Guerrero-Sanchez,<sup>\*a,b,c,‡</sup> Richard Hoogenboom<sup>a</sup>  
and Ulrich S. Schubert<sup>\*a,c,d</sup>

<sup>a</sup> Laboratory of Macromolecular Chemistry and Nanoscience, Eindhoven University of Technology, PO Box 513, 5600 MB Eindhoven, The Netherlands

<sup>b</sup> Ioniqa Technologies, Horsten 1, 5612 AX Eindhoven, The Netherlands

E-mail: [c.guerrero@ioniqa.com](mailto:c.guerrero@ioniqa.com); <http://www.ioniqa.com>

<sup>c</sup> Dutch Polymer Institute, PO Box 902, 5600 AX Eindhoven, The Netherlands

<sup>d</sup> Laboratory of Organic and Macromolecular Chemistry, Friedrich-Schiller-University Jena, Humboldtstr. 10, D-07745 Jena, Germany

E-mail: [ulrich.schubert@uni-jena.de](mailto:ulrich.schubert@uni-jena.de); <http://www.schubert-group.com>

<sup>‡</sup> Current address: CSIRO, Materials Science and Engineering Division, Bag 10, Clayton South MDC, 3169 Victoria, Australia

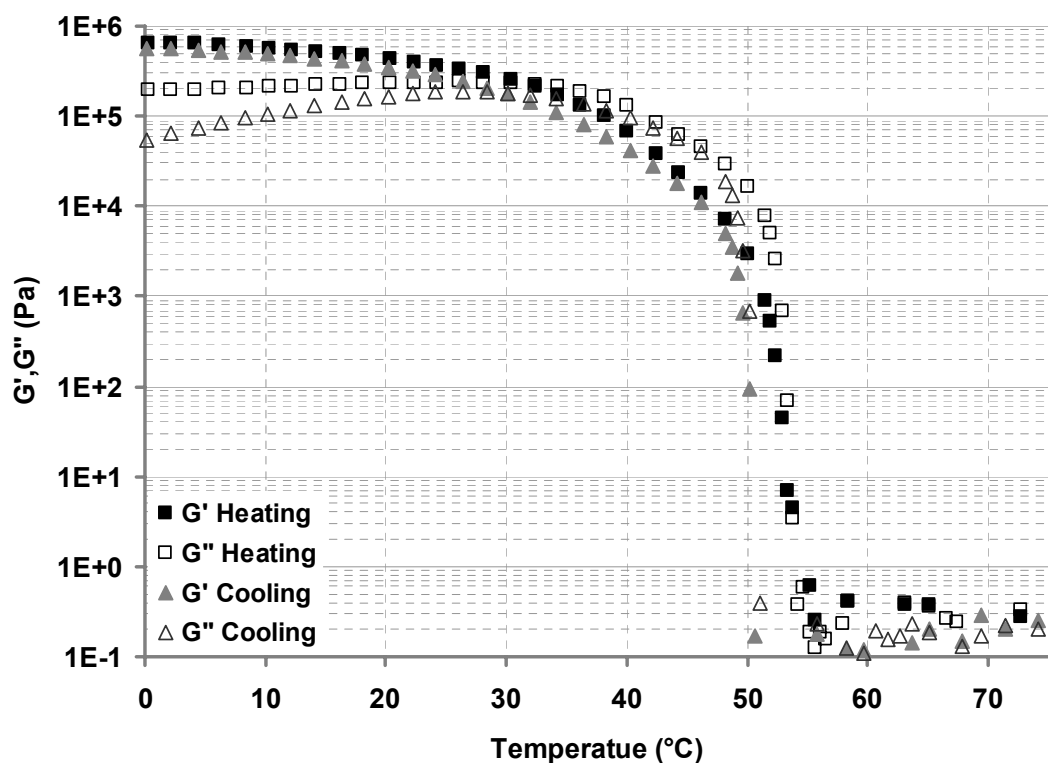

**Fig. S1** Rheological properties as a function of temperature for an IG derived from the aqueous gelation of A100 IL (60 wt. %). Heating-cooling cycles of the IG during the oscillatory shear measurements demonstrated the thermoreversible behavior of these materials.
